# Supplementary material for: A simple large-scale preparation and crystal phase control method for Cu2Se by exfoliation from copper foam under a Se-rich airflow
Source: Royal Society of Chemistry journal article supplement (doi:10.1039/d3ce00023k), 2023-01-01
Supplement: d3ce00023k1.pdf [file d3ce00023k1.pdf]

## Supporting Information

A simple large-scale preparation and crystal phase control method of  
 $\text{Cu}_2\text{Se}$  by exfoliating from copper foam under Se-rich airflow

*Dan He<sup>a</sup>, Yuxuan Ma<sup>b</sup>, Yongping Ding<sup>b</sup>, Xiaoxue Yang<sup>a</sup>, Fenghua Bai<sup>a\*</sup> and A<sup>b\*</sup>*

<sup>a</sup>Inner Mongolia Key Laboratory of Chemistry and Physics of Rare Earth Materials,  
School of Chemistry and Chemical Engineering, Inner Mongolia University, Hohhot,  
Inner Mongolia 010021, P. R. China, wang\_xiao\_jing@hotmail.com.

<sup>b</sup>School of Ecology and Environment Department, Inner Mongolia University,  
Hohhot, Inner Mongolia 010021, P. R. China.

### Text S1: Calculation detail

In this work, ab initio molecular dynamics (AIMD) was used to perform theoretical simulations and combined with molecular dynamics to calculate the material properties at high temperatures. Since high temperatures will cause thermal vibrations of the atoms, the calculations for the material are accompanied by thermal rise and fall. Therefore, we calculated 10000 steps for the Cu<sub>2</sub>Se cell after expanding 2 times all three directions of  $a_1$ ,  $a_2$ , and  $a_3$ , and obtained 10000 instantaneous structures and the corresponding lattice constants  $a_1$ ,  $a_2$ , and  $a_3$ , then the average values were calculated to obtain the corresponding calculation results.

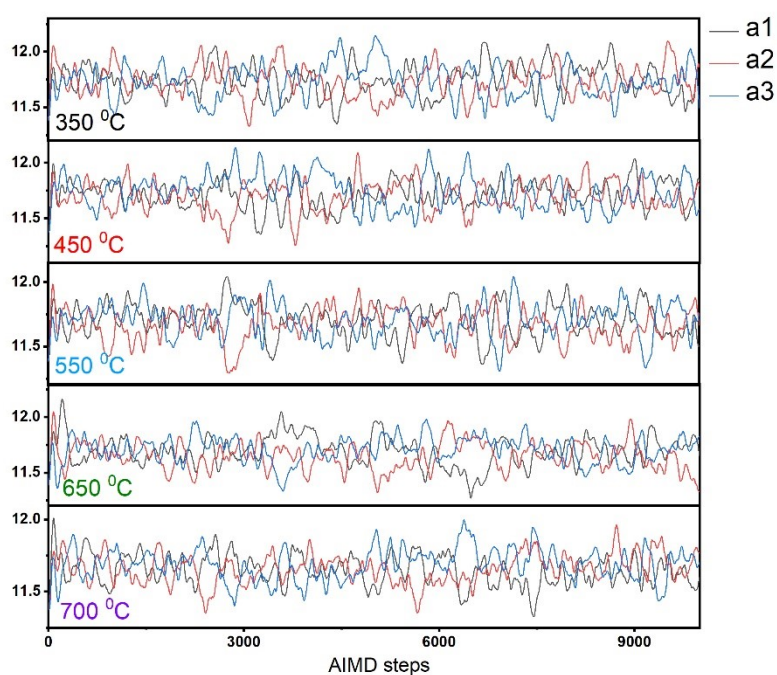

**Fig. S1** Calculated lattice constants  $a_1$ ,  $a_2$ ,  $a_3$  for Cu<sub>2</sub>Se at 350 °C, 450 °C, 550 °C, 650 °C, 700 °C

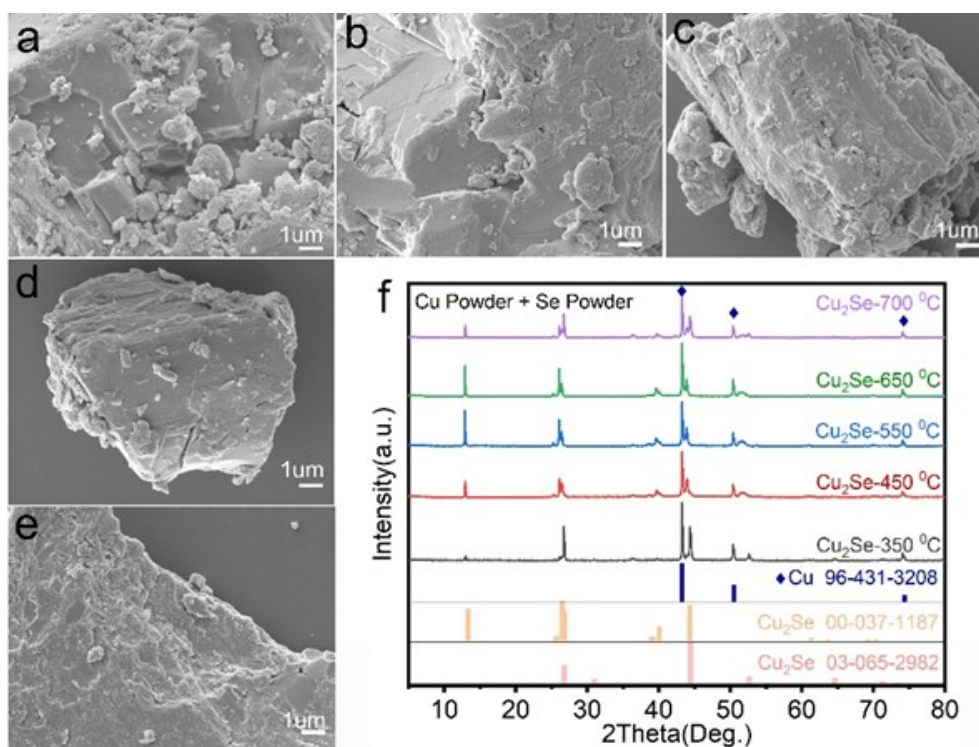

**Fig S2.** (a-e)  $\text{Cu}_2\text{Se-GX}$  ( $X=350\text{ }^\circ\text{C}$ ,  $450\text{ }^\circ\text{C}$ ,  $550\text{ }^\circ\text{C}$ ,  $650\text{ }^\circ\text{C}$  and  $700\text{ }^\circ\text{C}$ ) prepared by calcination of copper and selenium powders after complete mixing, (f) XRD pattern of  $\text{Cu}_2\text{Se-GX}$ .

**Table S1.** Cu, Se content of  $\text{Cu}_2\text{Se-550 }^\circ\text{C}$

|    | ICP (%) | XPS (%) |
|----|---------|---------|
| Cu | 62.6    | 22.4    |
| Se | 35.5    | 13.6    |
